# Supplementary material for: Coordinate bond- and hydrogen bond-assisted electron transfer strategy towards the generation of photochromic metal phosphites
Source: Royal Society of Chemistry journal article supplement (doi:10.1039/d0dt03010d), 2020-01-01
Supplement: d0dt03010d1.pdf [file d0dt03010d1.pdf]

## Supporting Information

### **Coordinate bond- and hydrogen bond-assisted electron transfer strategy towards the generation of photochromic metal phosphites based on nonphotoactive polypyridine units**

Ai-Ju Liu, Yue Han, Fei Xu, Song-De Han\*, Jie Pan, Guo-Ming Wang\*

*College of Chemistry and Chemical Engineering, Qingdao University, Shandong 266071, P. R. China.*

---

\*Author to whom correspondence should be addressed. E-mail: hansongde@yeah.net (S.-D. Han), gmwang\_pub@163.com (G.-M. Wang)

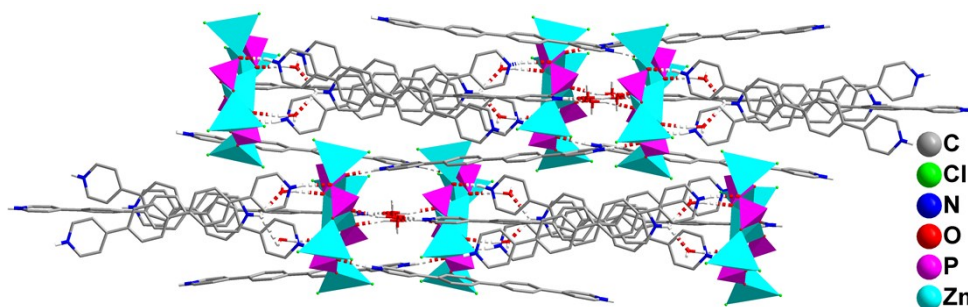

**Fig. S1** The hydrogen bond-driven supramolecular extended structure of **2** with H-bonds shown as dashed lines.

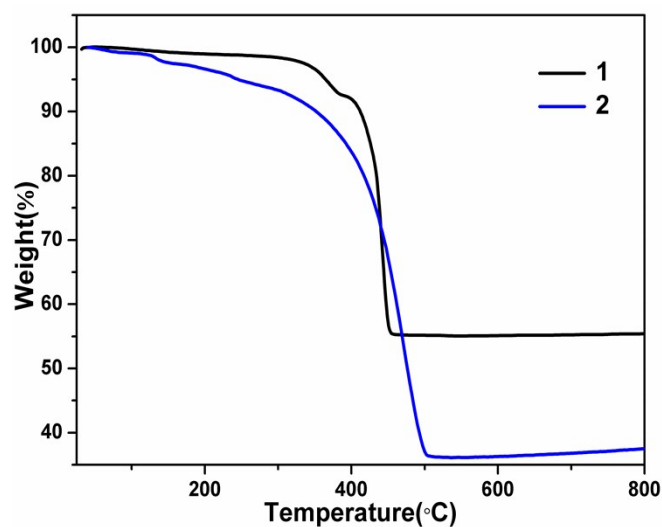

**Fig. S2** The TG plots of **1** and **2**.

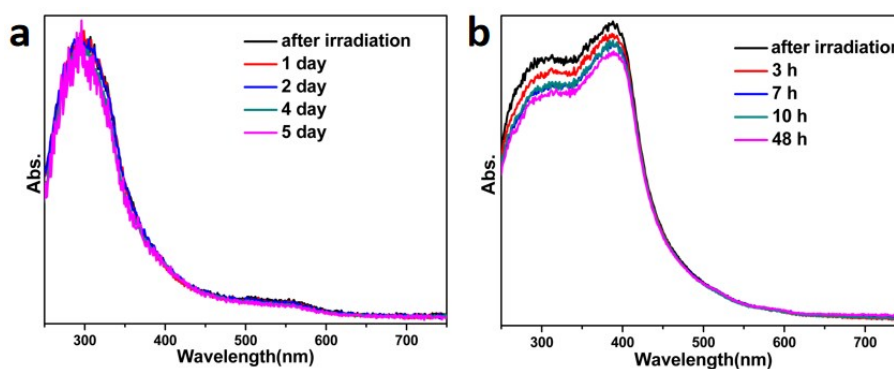

**Fig. S3** Time-dependent UV-Vis spectra of colored sample of **1** (a) and **2** (b) via putting the corresponding sample in darkness.

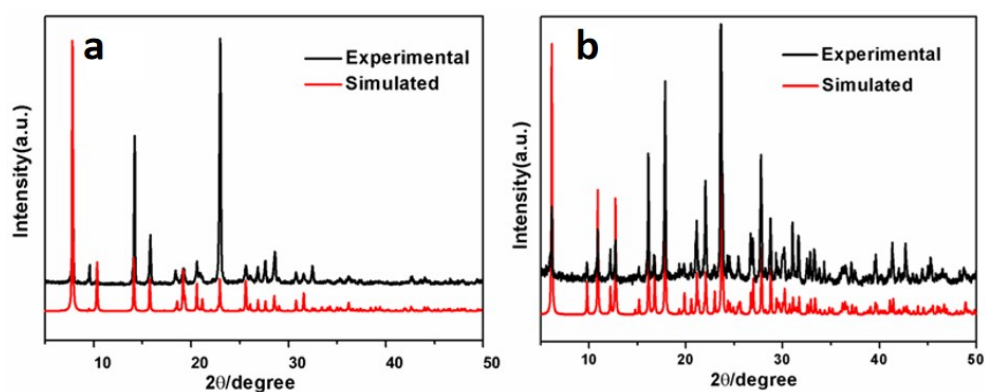

**Fig. S4** PXR D patterns of the photoactivated sample of **1** (left) and **2** (right).

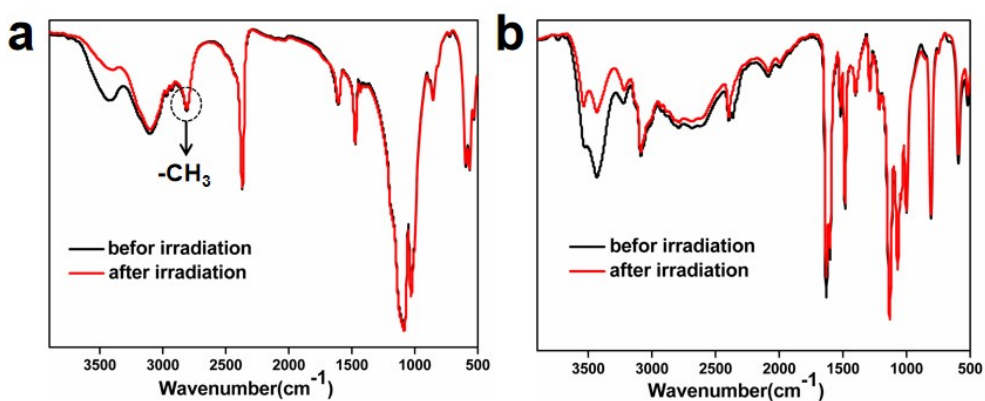

**Fig. S5** IR patterns of **1** (a) and **2** (b).

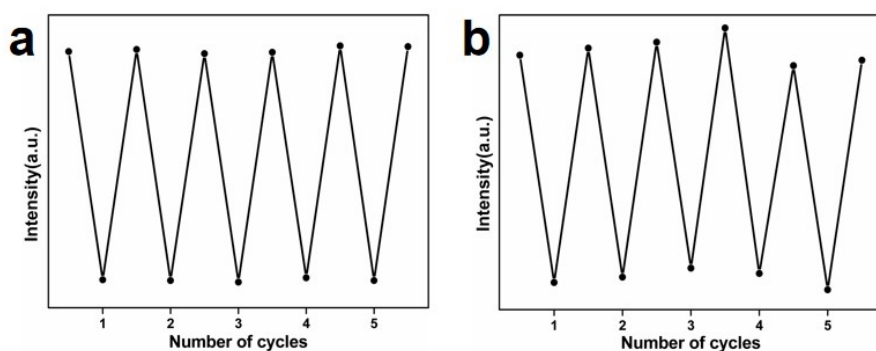

**Fig. S6** Recycle results of photoluminescence for **1** (a) excited at 280 nm and **2** (b) excited at 280 nm via alternatively conducting Xe-lamp irradiation and heating treatments.

**Table S1.** SHAPE analysis of the Zn(II) ions in **1** and **2**

| Metal        | Label | Shape       | Symmetry | Distortion |
|--------------|-------|-------------|----------|------------|
| <b>1-Zn1</b> | SP-4  | Square      | $D_{4h}$ | 31.645     |
| <b>1-Zn1</b> | T-4   | Tetrahedron | $T_d$    | 0.262      |
| <b>1-Zn1</b> | SS-4  | Seesaw      | $C_{2v}$ | 8.107      |
| <b>2-Zn1</b> | SP-4  | Square      | $D_{4h}$ | 29.324     |
| <b>2-Zn1</b> | T-4   | Tetrahedron | $T_d$    | 0.938      |
| <b>2-Zn1</b> | SS-4  | Seesaw      | $C_{2v}$ | 6.526      |
| <b>2-Zn2</b> | SP-4  | Square      | $D_{4h}$ | 31.580     |
| <b>2-Zn2</b> | T-4   | Tetrahedron | $T_d$    | 0.035      |
| <b>2-Zn2</b> | SS-4  | Seesaw      | $C_{2v}$ | 9.055      |

**Table S2.** Selected bond lengths (Å) and angles (°) for **1**

|                     |            |                 |            |
|---------------------|------------|-----------------|------------|
| Zn(1)-O(3)#1        | 1.904(2)   | P(1)-O(1)       | 1.497(2)   |
| Zn(1)-O(2)#2        | 1.916(3)   | P(1)-O(2)       | 1.500(3)   |
| Zn(1)-O(1)          | 1.922(2)   | P(1)-O(3)       | 1.503(3)   |
| Zn(1)-N(1)          | 2.045(3)   |                 |            |
| O(3)#1-Zn(1)-O(2)#2 | 114.05(13) | O(1)-Zn(1)-N(1) | 107.95(13) |
| O(3)#1-Zn(1)-O(1)   | 109.62(11) | O(1)-P(1)-O(2)  | 114.53(16) |
| O(2)#2-Zn(1)-O(1)   | 116.92(11) | O(1)-P(1)-O(3)  | 110.72(15) |
| O(3)#1-Zn(1)-N(1)   | 106.12(12) | O(2)-P(1)-O(3)  | 113.41(16) |
| O(2)#2-Zn(1)-N(1)   | 101.11(12) |                 |            |

Symmetry codes: #1: x, y+1, z; #2: -x+5/2, y+1/2, -z+1/2; #3: -x+1, -y+1, -z; #4: -x+5/2, y-1/2, -z+1/2; #5: x, y-1, z.

**Table S3.** Selected bond lengths (Å) and angles (°) for **2**

|                   |            |                     |            |
|-------------------|------------|---------------------|------------|
| Zn(1)-O(1)        | 1.917(3)   | Zn(1)-Cl(2)         | 2.2242(13) |
| Zn(1)-O(2)        | 1.958(3)   | P(1)-O(1)#4         | 1.492(3)   |
| Zn(2)-O(3)        | 1.945(3)   | P(1)-O(2)           | 1.515(3)   |
| Zn(1)-Cl(1)       | 2.2274(13) | P(1)-O(3)           | 1.512(3)   |
| O(1)-Zn(1)-Cl(2)  | 105.52(11) | O(3)-Zn(2)-O(3)#5   | 108.41(8)  |
| O(2)-Zn(1)-Cl(2)  | 109.40(9)  | O(3)-Zn(2)-O(3)#4   | 108.40(8)  |
| O(1)-Zn(1)-Cl(1)  | 110.94(12) | O(3)-Zn(2)-O(3)#6   | 111.62(16) |
| O(2)-Zn(1)-Cl(1)  | 101.43(9)  | O(3)#5-Zn(2)-O(3)#6 | 108.41(8)  |
| Cl(2)-Zn(1)-Cl(1) | 118.56(5)  | O(1)#5-P(1)-O(3)    | 114.89(19) |
| O(1)-Zn(1)-O(2)   | 111.02(14) | O(1)#5-P(1)-O(2)    | 108.66(18) |
| O(3)-Zn(2)-O(3)#5 | 108.41(8)  | O(3)-P(1)-O(2)      | 113.49(17) |
| O(3)-Zn(2)-O(3)#6 | 111.61(16) |                     |            |

Symmetry codes: #1: -x+1/2, -y+1/2, -z+1/2; #2: -x+2, -y+1/2, z+0; #3: y+3/4, -x+5/4, -z+9/4; #4: y-1/4, -x+5/4, -z+1/4; #5: -y+5/4, x+1/4, -z+1/4; #6: -x+1, -y+3/2, z+0.

**Table S4** Details of selected hydrogen bond in **2**

| D-H...A         | $d(\text{D-H})$ (Å) | $d(\text{H...A})$ (Å) | $d(\text{D...A})$ (Å) | $\angle(\text{DHA})$ (deg) |
|-----------------|---------------------|-----------------------|-----------------------|----------------------------|
| O4-H4A...O3_§1  | 0.96                | 1.86                  | 2.803(6)              | 167                        |
| O4-H4B...Cl1_§2 | 0.96                | 2.33                  | 3.289(8)              | 175                        |
| N1-H1...O2_§3   | 0.86                | 1.91                  | 2.756(6)              | 166                        |
| N2-H2A...O4     | 0.86                | 2.14                  | 2.783(10)             | 132                        |

Symmetry codes: §1: 1/4+y, 3/4-x, 3/4-z; §2: 1-x, 1-y, 1-z; §3: -1/4+y, 3/4-x, -1/4+z.
